# Supplementary material for: Structures of Vac8-containing protein complexes reveal the underlying mechanism by which Vac8 regulates multiple cellular processes
Source: PubMed Central journal article supplement — Proc Natl Acad Sci U S A. 2023 Apr 24;120(18):e2211501120. doi: 10.1073/pnas.2211501120 (PMC10161063; doi:10.1073/pnas.2211501120), 2023-04-24
Supplement: pnas.2211501120.sapp.pdf [file pnas.2211501120.sapp.pdf]

# 1 Supporting information

## 2 SI materials and methods

3 **SEC analysis.** To assay the interaction between various forms of Vac8 and Vac17, protein  
4 samples (10–20  $\mu$ M final protein concentration) were prepared in 20 mM Tris-HCl pH  
5 7.5, 150 mM NaCl, and 5 mM dithiothreitol at 4°C. Proteins were applied to a HiLoad  
6 16/60 Superdex 200 pg column (GE Healthcare). Molecular mass standards comprising  
7 ferritin (440 kDa), aldolase (158 kDa), conalbumin (75 kDa), ovalbumin (44 kDa),  
8 carbonic anhydrase (29 kDa), and ribonuclease A (13.7 kDa) were used for calibration.  
9 The eluted protein samples were subjected to SDS-PAGE followed by Coomassie  
10 Brilliant Blue staining.

11

12 **Pull-down assay.** For the His<sub>6</sub>-tag pull-down assay shown in Figure 1A, supernatants from  
13 *E. coli* cells expressing various truncated Vac17 proteins (His<sub>6</sub>-SUMO-fusion) were  
14 mixed with 10  $\mu$ L Ni-NTA agarose beads (Qiagen, Germany) for 1 h at 4°C. After  
15 incubation, beads were washed three times with buffer B (25 mM sodium phosphate pH  
16 7.4, 400 mM sodium chloride, 50 mM imidazole, 0.1% Triton X-100, and 0.1% NP-40)  
17 and then mixed with 100  $\mu$ g purified wild-type or mutant Vac8 proteins in a total volume  
18 of 600  $\mu$ L. The assay mixture was incubated at 4°C for 60 min, and beads were washed  
19 three times with 600  $\mu$ L buffer B. Proteins were eluted with SDS sample buffer and  
20 subjected to 12% SDS-PAGE. For the experiment presented in Figure 5C, supernatants  
21 of *E. coli* cells co-expressing GST-Vac8 (residues 1–39); Vac8 (residues 40–578); and  
22 His<sub>6</sub>-tagged tVac17, Nvj1, or Atg13 were incubated with 10  $\mu$ L Ni-NTA agarose beads  
23 for 1 h at 4°C. The beads were washed three times with buffer B, and then proteins were  
24 analyzed by 15% SDS-PAGE. For the GST pull-down assay shown in Figure 2C and  
25 Supplementary Figure S5C, supernatants of *E. coli* cells expressing wild-type or mutant  
26 GST-Vac8 (residues 1–578) were incubated with Glutathione Sepharose 4B beads (GE  
27 Healthcare) for 1 h at 4°C. Beads were washed twice with buffer A and mixed with 100  
28  $\mu$ g Halo-tag-fused tVac17, Nvj1<sup>229-321</sup>, and Atg13<sup>567-695</sup> proteins for 1 h at 4°C. The

29 mixtures were washed again three times with buffer A, and proteins were analyzed by  
30 12% SDS-PAGE.

31

32 **ITC analysis.** For ITC experiments, protein samples (sample cell: 0.05 mM, syringe: 0.7  
33 mM) indicated in Figures 2D and 4B were prepared in buffer C (25 mM Tris-HCl pH 7.5,  
34 150 mM NaCl, and 4 mM  $\beta$ -mercaptoethanol). ITC measurements were performed using  
35 a Microcal ITC200 instrument (Malvern Panalytical, UK) at 25°C. Measurements were  
36 taken over 20 injections of 2  $\mu$ L sample with a reference power of 5  $\mu$ cal/s and at a  
37 stirring speed of 1000 rpm. The data were fitted using MicroCal PEAQ-ITC analysis  
38 software (Malvern Panalytical) with a 1:1 binding model.

39

40 **Induction of Cvt.** Cells were inoculated in YPD medium and grown overnight at 30°C  
41 in a shaking incubator. Thereafter, cells were diluted to an OD<sub>600</sub> of 0.1 in YPD medium  
42 containing FM 4-64 (1  $\mu$ M) and incubated at 30°C for 1 h. Finally, cells were collected  
43 by centrifugation (3,000  $\times$ g) at room temperature for 1 min, resuspended in fresh YPD or  
44 SD-N medium, and further grown at 30°C for 3 h.

45 **Protein extraction from yeast cells and immunoblotting.** Yeast cells were grown in YPD  
46 medium overnight and collected by centrifugation (3,000  $\times$ g) at room temperature for 1  
47 min when OD<sub>600</sub> had reached 1.5–2.0. Thereafter, cells were resuspended in 0.1 mL PBS  
48 and 0.1 mL of 2 $\times$  SDS-PAGE sample buffer and mixed with 0.1 mL glass beads (0.5 mm  
49 diameter; BioSpec, Bartlesville, OK, USA) for cell lysis. After three cycles of boiling and  
50 vortexing (1 min each), cell lysates were recovered by centrifugation (room temperature,  
51 1 min, 10,000  $\times$ g). Protein extracts were analyzed by SDS-PAGE followed by  
52 immunoblotting using anti-Vac8, anti-myc (Cell Signaling Technology, Danvers, MA,  
53 USA), and anti-Act1 antibodies.

54 **Coimmunoprecipitation.** Yeast spheroplasts were prepared as described (1),  
55 resuspended in ice-cold solubilization buffer (25 mM Tris-Cl, pH 7.4, 150 mM NaCl, 1%

56 NP-40, 1 mM EDTA, 5% glycerol, 1 mM PMSF, and 10 mM leupeptin), and incubated  
57 on ice for 20 min. Detergent-insoluble material was removed by centrifugation at 16,200  
58  $\times g$  (10 min, 4°C). The resulting post-centrifugation supernatants were precleared by  
59 incubation with protein A Sepharose (GE Healthcare) at 4°C for 1 h. Anti-myc antibodies,  
60 control mouse IgG, anti-GFP antibodies, or control rabbit IgG were added to the  
61 precleared supernatants and incubated at 4°C on a nutator mixer for 5 h. Protein A  
62 Sepharose was then added and further incubated for 1 h. Protein A Sepharose beads  
63 were collected by centrifugation at 3,000  $\times g$  (1 min, 4°C) and washed three times with  
64 ice-cold solubilization buffer. Bound proteins were eluted with SDS sample buffer for  
65 SDS-PAGE analysis followed by immunoblotting using anti-myc and anti-GFP antibodies.

66 **Supplementary figures**

67

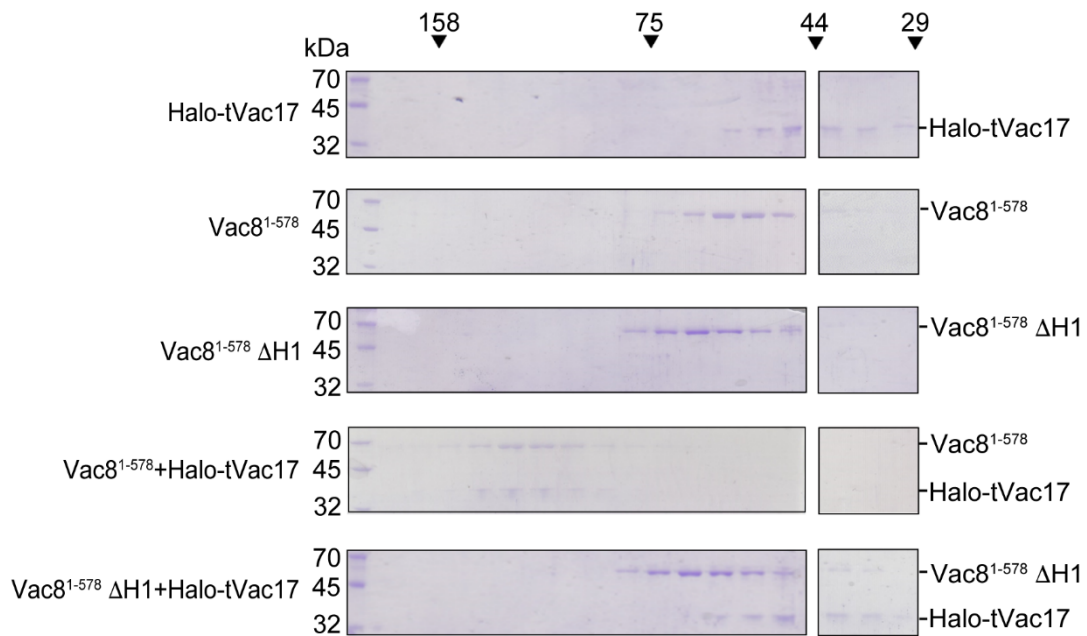

68

69 **Supplementary Figure S1. SDS-PAGE shows the eluted protein fractions separated by**  
70 **SEC shown in Figure 1B. The standard molecular masses are shown above the gels.**

71

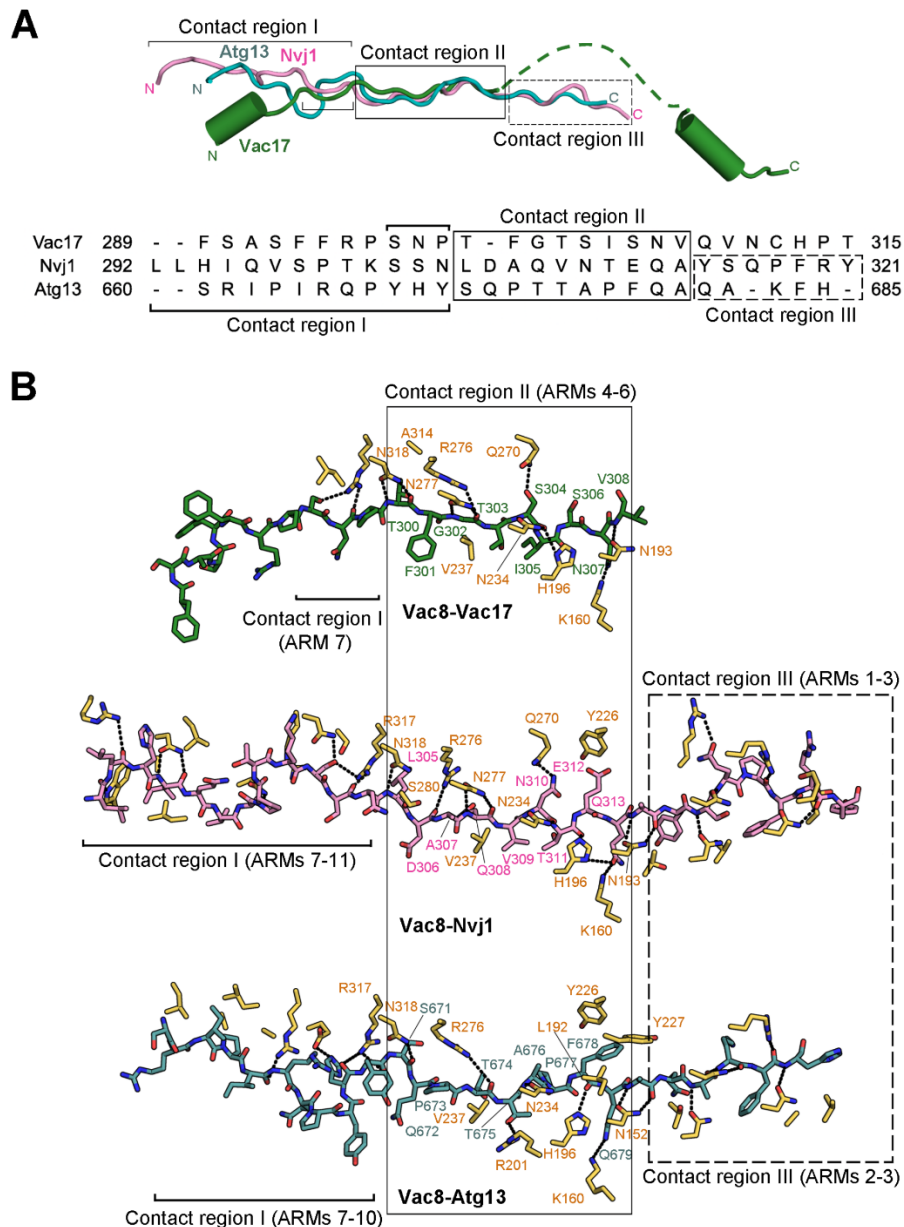

72

73 **Supplementary Figure S2. Structural comparison of Vac17, Atg13, and Nvj1 in complex**  
 74 **with Vac8.** (A) Ribbon representation showing the superposition of Vac17 (green), Nvj1  
 75 (pink), and Atg13 (teal) bound to tVac8. Based on structural conservation, contact sites  
 76 between Vac8 and its binding partners are divided and highlighted. The sequence  
 77 alignment of *S. cerevisiae* Vac17, Nvj1, and Atg13 is shown below. (B) Comparison of  
 78 the interactions between the central ARM domain of Vac8 (yellow/orange) and its  
 79 binding peptides Vac17 (green), Nvj1 (pink), and Atg13 (teal). Oxygen and nitrogen

80 atoms are colored red and blue, respectively. Black dotted lines indicate intermolecular  
 81 hydrogen bonds.

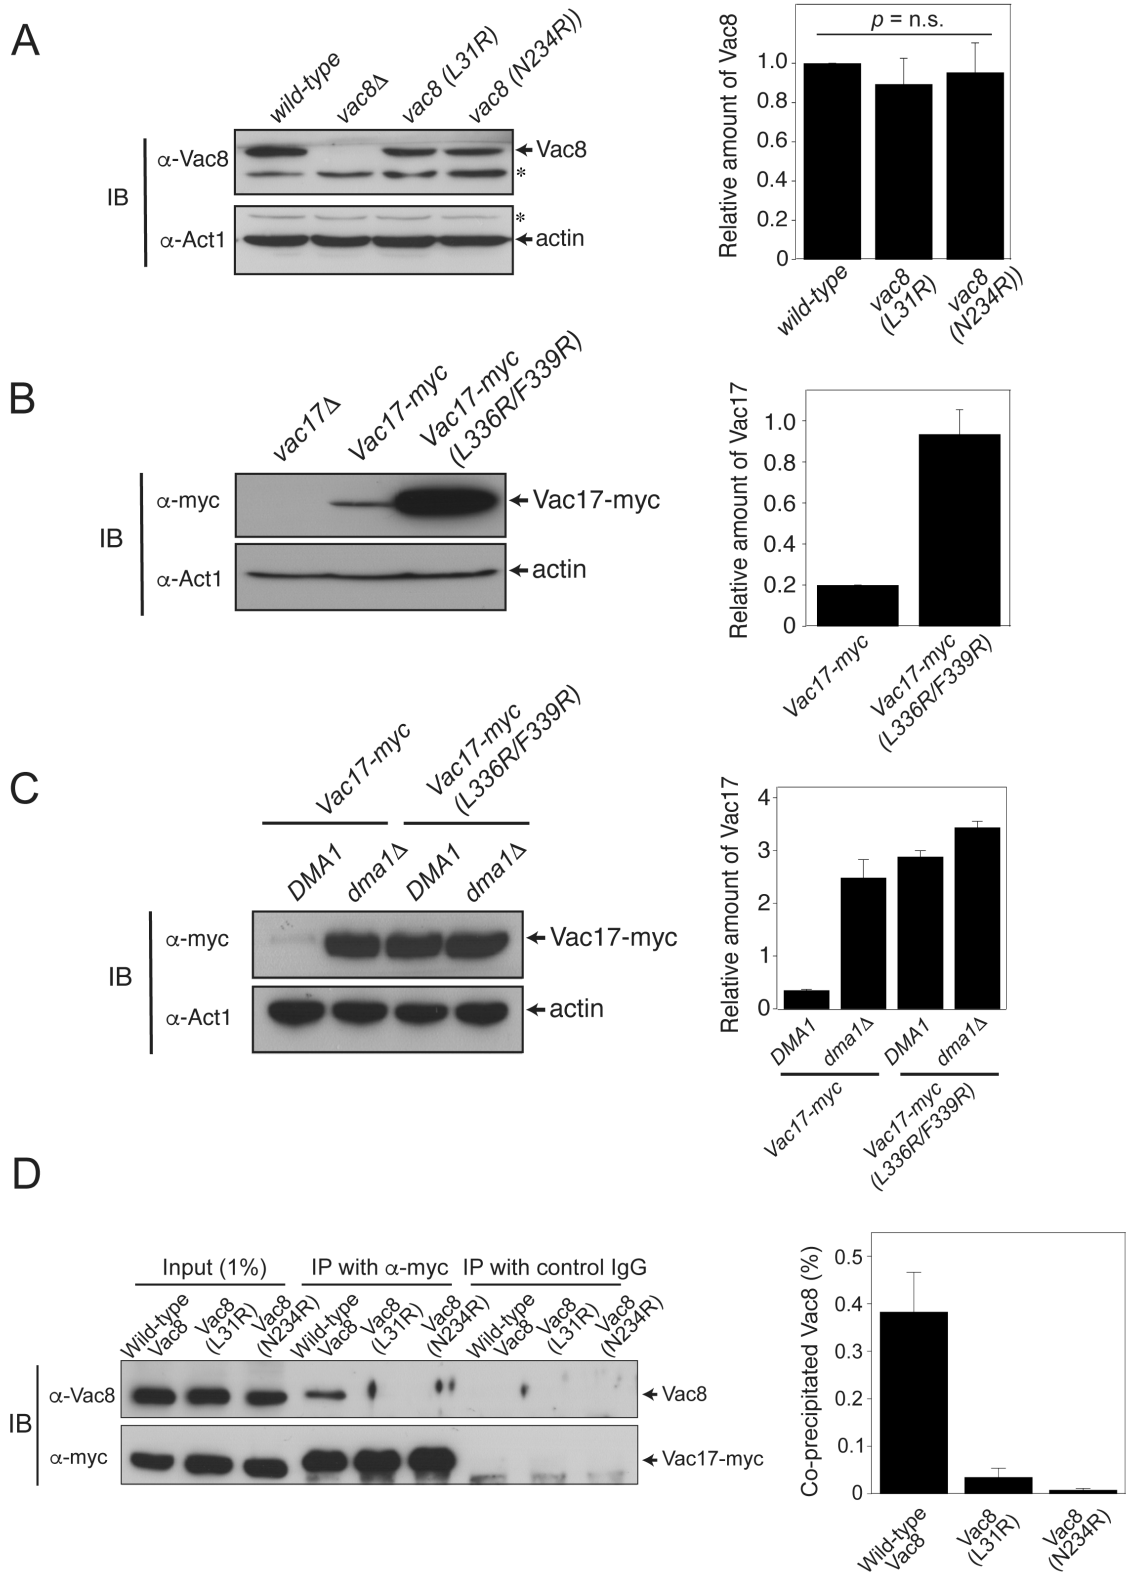

82

83 **Supplementary Figure S3. Comparable expression of wild-type Vac8 and Vac17 versus**  
84 **mutant Vac8 and Vac17.** (A) Expression of wild-type Vac8, Vac8(L31R), and  
85 Vac8(N234R) was analyzed by immunoblotting. The expression level of Vac8 proteins  
86 was normalized to that of actin and quantified in the bar graph on the right. Data  
87 represent the means  $\pm$  SEM (error bars; n = 3). p = n.s. Tukey's test. Asterisks indicate  
88 non-specific bands. (B) Expression of myc-tagged wild-type Vac17 or Vac17  
89 (L336R/F339R) in *vac17* $\Delta$  yeast cells was analyzed by immunoblotting. Actin was used  
90 as a loading control. The expression level of Vac17 proteins was normalized to that of  
91 actin and quantified in the bar graph on the right. Data represent the means  $\pm$  SEM (error  
92 bars; n = 3). (C) The Vac17 (L336R/F339R) mutant, defective for Vac8 binding, is more  
93 resistant than wild-type Vac17 to Dma1-mediated ubiquitinylation followed by  
94 proteasomal degradation. The expression of myc-tagged wild-type Vac17 or Vac17  
95 (L336R/F339R) in *DMA1/vac17* $\Delta$  or *dma1* $\Delta$ /*vac17* $\Delta$  yeast cells was analyzed by  
96 immunoblotting. Actin was used as a loading control. (D) The L31R or N234R mutation  
97 of Vac8 largely abolishes the interaction between Vac8 and Vac17-myc. Yeast  
98 spheroplasts were detergent-solubilized, and detergent-insoluble material was removed  
99 by centrifugation. The resulting post-centrifugation supernatants were precleared by  
100 incubation with protein A Sepharose and treated with anti-myc antibodies or control  
101 mouse IgG. Protein A Sepharose was then added, and bound proteins were eluted with  
102 SDS sample buffer for SDS-PAGE analysis followed by immunoblotting with anti-myc  
103 and anti-Vac8 antibodies.

104

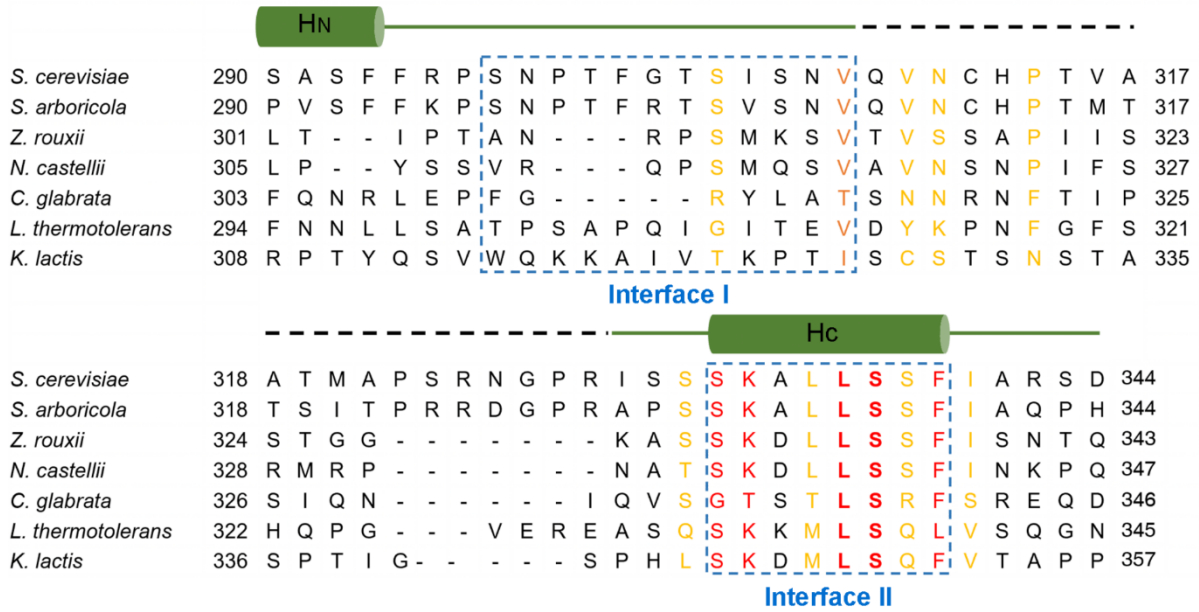

105

106 **Supplementary Figure S4. Sequence alignment of tVac17 (Vac8-binding domain) from**  
 107 **seven species.** Sequence alignment of tVac17 from *S. cerevisiae* (UniProt entry: P25591),  
 108 *S. arboricola* (UniProt entry: J8PR22), *Z. rouxii* (C5DZ63), *N. castellii* (G0VAW8), *C.*  
 109 *glabrata* (Q6FX71), *L. thermotolerans* (C5DJZ0), and *K. lactis* (Q6CV25). Secondary  
 110 structural elements based on the crystal structure are shown above the sequence by  
 111 green cylinders ( $\alpha$ -helices), green lines (loops), and black dashed lines (disordered  
 112 regions). Sequence conservation at each amino acid is represented by a color gradient  
 113 from yellow (70% identity) to bold red (100% identity). The Vac8-binding interfaces  
 114 (Interfaces I and II) are marked by blue dashed boxes.

115



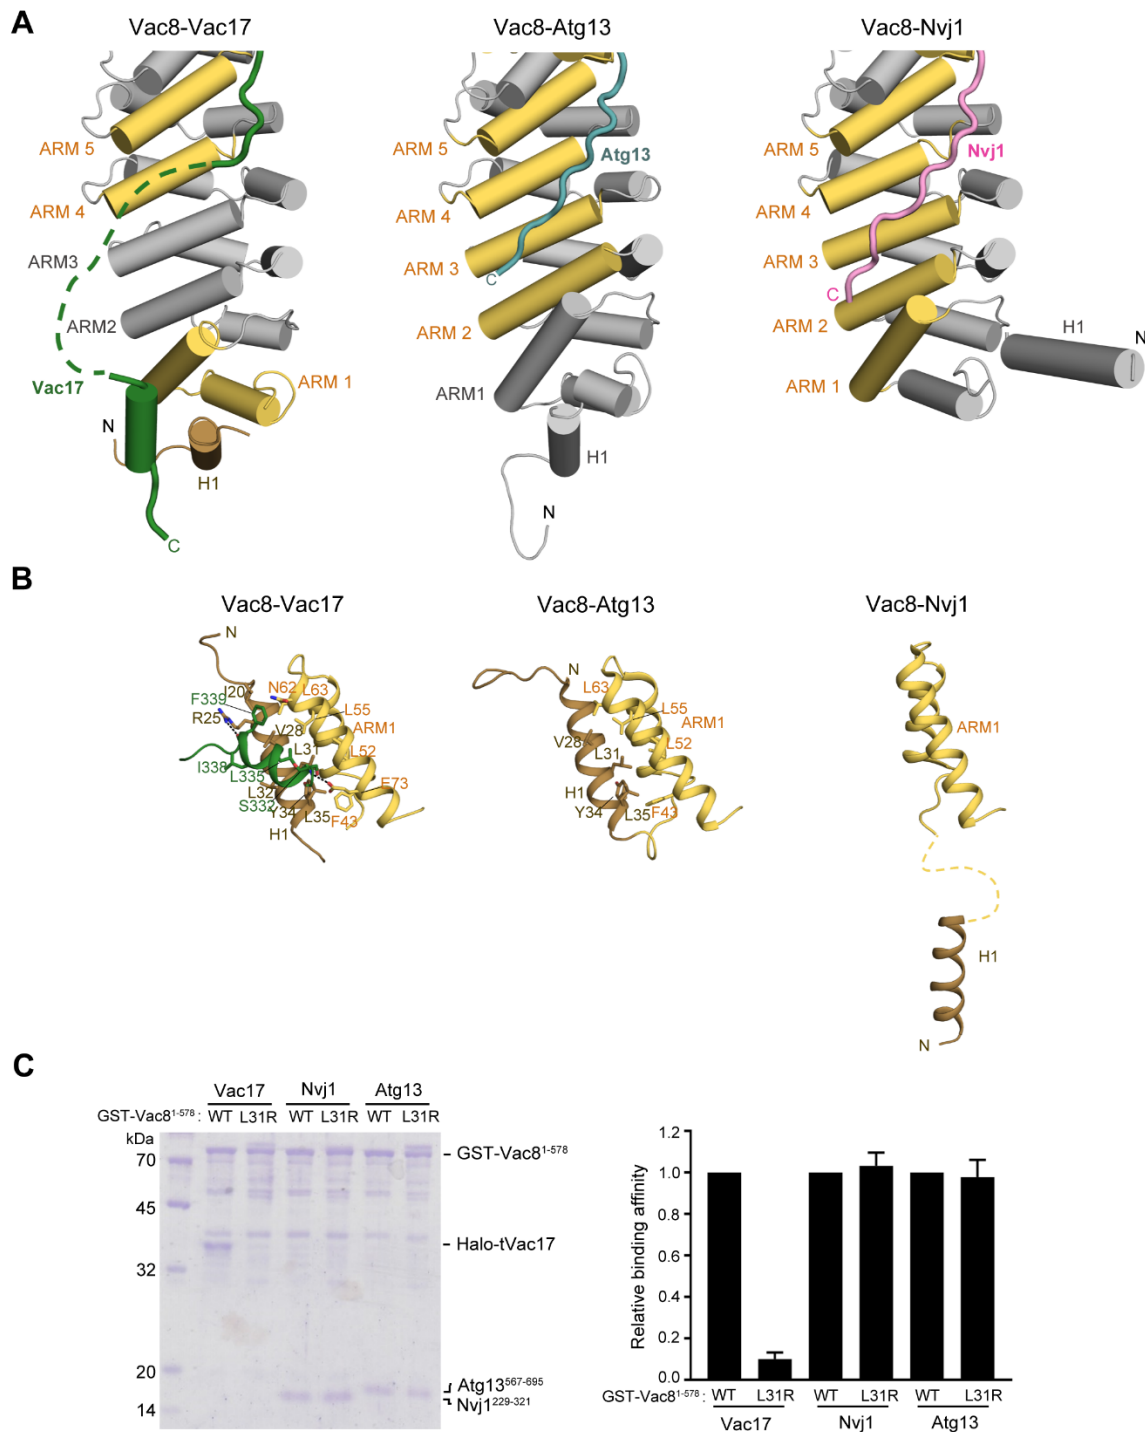

116

117 **Supplementary Figure S5. Dynamic organization of the H1 helix of Vac8.** (A) Cartoon  
 118 representation structurally comparing the Vac8 H1 helix when Vac8 interacts with the  
 119 Vac17, Atg13, or Nvj1 peptide. The ARM repeat helices involved in the interaction with  
 120 peptides are highlighted in yellow. The H1 helix is colored brown. (B) Ribbon diagrams

121 comparing the structural conformation of ARM1 (H2 and H3 helices) and the H1 helix  
122 of Vac8 between the Vac8-Vac17, Vac8-Atg13, and Vac8-Nvj1 complexes. In the Vac8-  
123 Vac17 complex, the Hc helix of Vac17 directly contacts both the H1 helix and ARM1 of  
124 Vac8. (C) GST pull-down experiments using wild-type Vac8 and the mutant Vac8 (L31R)  
125 show that the H1 helix of Vac8 is required for interaction with Vac17 but not with Nvj1  
126 or Atg13. The pull-down results are quantified in the bar graph on the right (n=3).

127

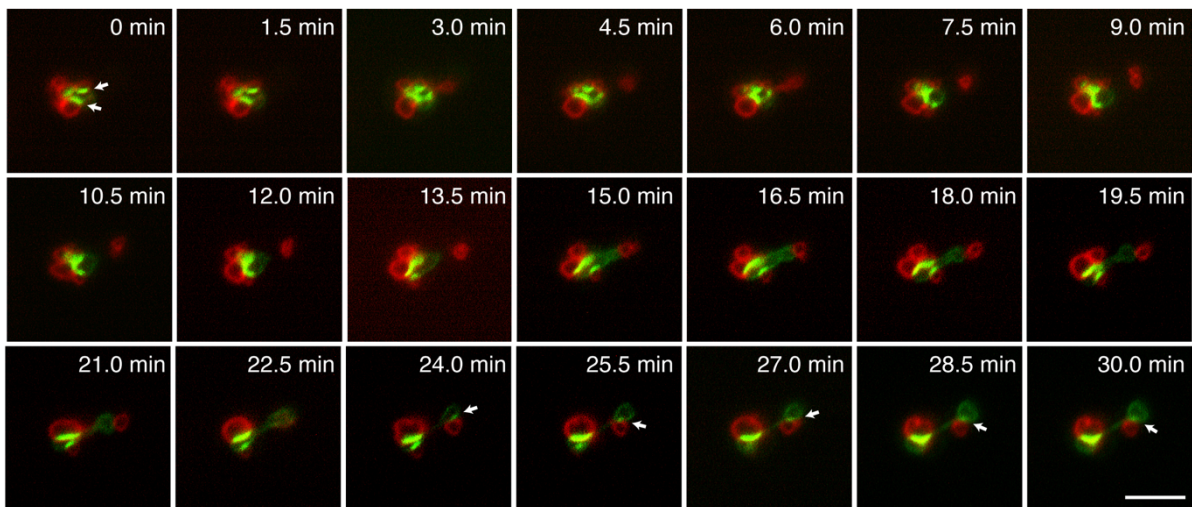

128

129 **Supplementary Figure S6. Live imaging of yeast cells undergoing mitosis revealed that**  
130 **preformed NVJs in mother cells remain largely intact during vacuole segregation into**  
131 **daughter cells.** Yeast cells expressing Nvj1-EGFP were stained with FM 4-64, and NVJs  
132 and organelle inheritance were analyzed by fluorescence microscopy. Images were  
133 taken every 1.5 min for 30 min, and images of a representative yeast cell are shown.  
134 White arrows indicate NVJs. Scale bar: 5  $\mu$ m.

135

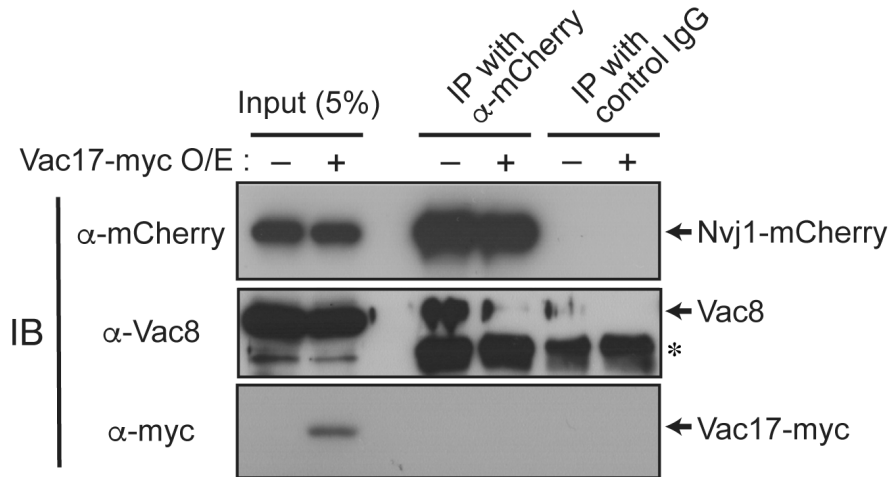

136

137 **Supplementary Figure S7. Vac17 over-expression (O/E) inhibits the Vac8-Nvj1**  
138 **interaction.** Yeast spheroplasts were prepared from yeast cells expressing Nvj1-mCherry  
139 with or without overexpression of Vac17-myc from the *GPD1* promoter (see  
140 Supplementary Table S3 for details of yeast strains used). The spheroplasts were  
141 detergent-solubilized, and detergent-insoluble material was removed by centrifugation.  
142 The resulting post-centrifugation supernatants were precleared by incubation with  
143 protein A Sepharose and treated with anti-mCherry antibodies or control rabbit IgG.  
144 Protein A Sepharose was then added, and bound proteins were eluted with SDS sample  
145 buffer for SDS-PAGE analysis followed by immunoblotting with anti-Vac8, anti-myc, or  
146 anti-mCherry antibodies. The asterisk indicates non-specific (IgG heavy chain) signals  
147 from the immunoprecipitating antibodies.

148

149

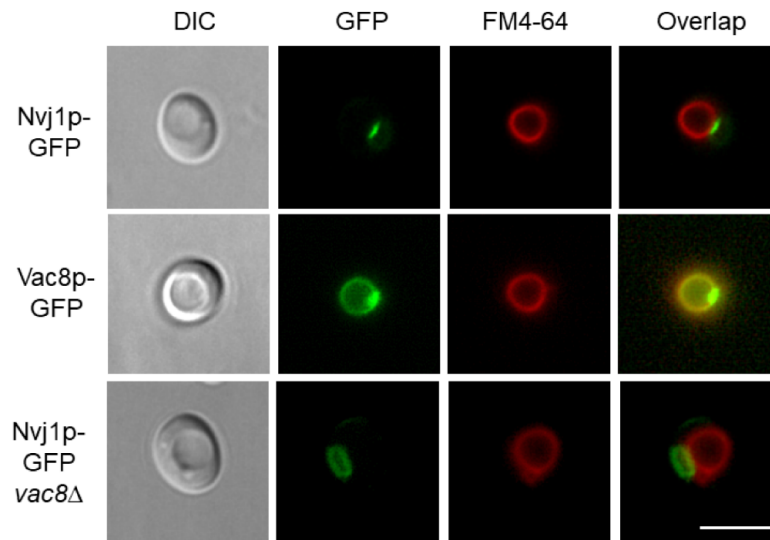

150

151 **Supplementary Figure S8.** The majority of Nvj1 seems to exist in Vac8-Nvj1 complexes,  
 152 but free Vac8 exists along the vacuolar membrane as a binding platform for various  
 153 proteins, including Atg13 and Vac17. Scale bar: 5  $\mu$ m.

154

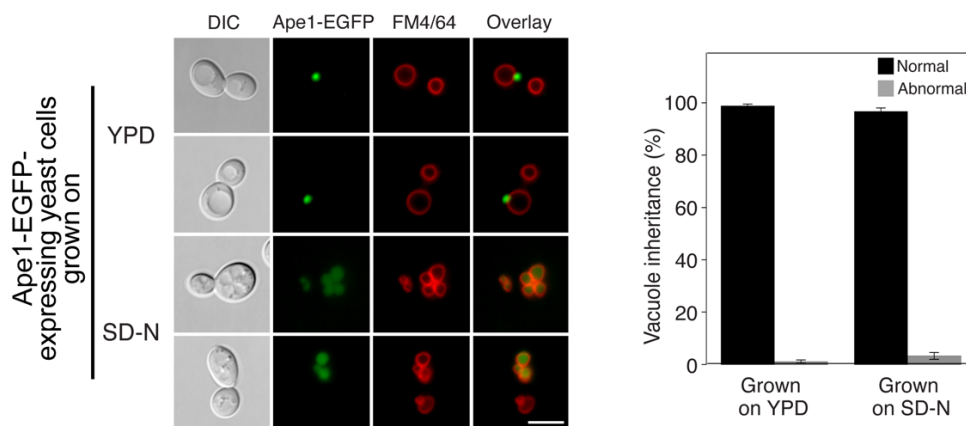

155

156 **Supplementary Figure S9. Vacuole inheritance and Cvt can occur simultaneously.** Yeast  
 157 cells expressing Ape1p-EGFP were grown in the presence of FM 4-64 at 30°C for 1 h.  
 158 Cells were then collected, resuspended in fresh YPD or SD-N medium, and further  
 159 incubated at 30°C for 3 h. Ape1p-EGFP and FM 4-64 were analyzed by fluorescence  
 160 microscopy. Representative images are shown (left) (scale bar: 5  $\mu$ m), and bar graphs  
 161 show the quantification of vacuole inheritance (right). More than 100 cells per strain  
 162 were examined in each experiment. Data represent the means  $\pm$  SEM (error bar; n=3).

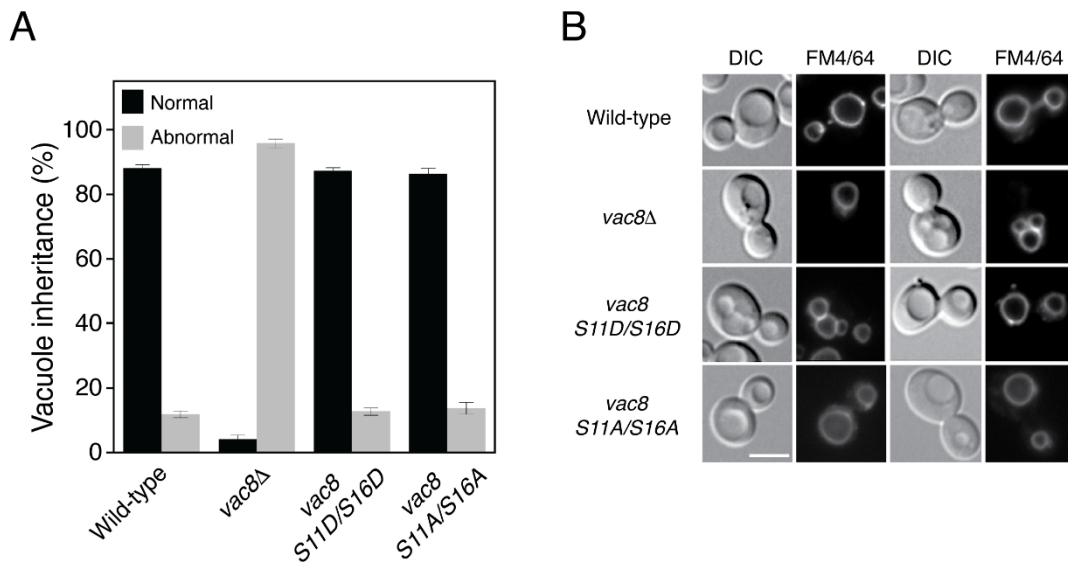

163

164 **Supplementary Figure S10.** Phosphorylation/dephosphorylation of Ser11 and Ser16 in  
 165 Vac8 does not seem critical for vacuole inheritance. (A) Wild-type, *vac8*Δ,  
 166 phosphorylation-mimetic mutant Vac8 (S11D/S16D), and phosphorylation-defective  
 167 mutant Vac8 (S11A/S16A) cells were stained with FM 4-64 and their vacuole inheritance  
 168 was analyzed by fluorescence microscopy. More than 100 cells per strain were  
 169 examined in each experiment. Data represent the means ± SEM (error bar; n=3). (B)  
 170 Representative images are shown. Scale bar: 5 μm.

171

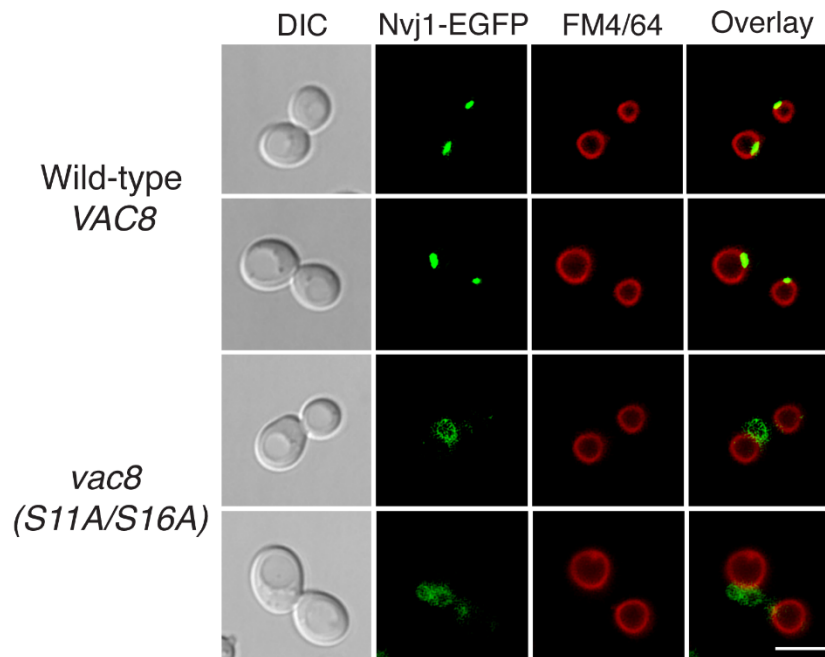

172

173 **Supplementary Figure S11. Alanine substitutions of Ser11 and Ser16 of Vac8 block the**  
 174 **formation of NVJs.** Yeast cells expressing Nvj1-EGFP were treated with FM 4-64, and  
 175 GFP fluorescence indicating NVJs and FM 4-64 fluorescence indicating vacuoles were  
 176 analyzed by fluorescence microscopy (magnification: 100×). DIC, differential  
 177 interference contrast.

178

179 **Supplementary Table S1.** Data collection and refinement statistics

|                                   |                           |
|-----------------------------------|---------------------------|
|                                   | tVac8-tVac17              |
| Dataset                           | Native                    |
| X-ray source                      | Beamline 5C, PAL          |
| Temperature (K)                   | 100                       |
| Space group:                      | I422                      |
| Cell parameters                   |                           |
| a, b, c (Å)                       | 147.446, 147.446, 121.514 |
| $\alpha$ , $\beta$ , $\gamma$ (°) | 90.000, 90.000, 90.000    |
| <hr/>                             |                           |
| Data processing                   |                           |
| Wavelength (Å)                    | 0.99190                   |
| Resolution (Å)                    | 50.00–2.10                |
| CC1/2                             | 0.999 (0.365)             |
| I/ $\sigma$                       | 27.2 (2.48)               |
| Completeness (%)                  | 99.6 (99.5)               |
| Redundancy                        | 9.5 (5.9)                 |
| Measured reflections              | 368,865                   |
| Unique reflections                | 38,976                    |
| <hr/>                             |                           |
| Refinement statistics             |                           |
| Resolution (Å)                    | 36.86–2.10                |
| Reflections                       | 38,971                    |
| Number of atoms                   |                           |
| Protein                           | 4008                      |
| Water                             | 191                       |
| R-factor (%)                      | 18.75                     |
| R <sub>free</sub> (%)             | 22.33                     |
| RMSD                              |                           |
| Bond lengths (Å)                  | 0.006                     |
| Bond angles (°)                   | 0.907                     |
| Ramachandran plot, residues in    |                           |
| Favored regions (%)               | 99.81                     |
| Allowed regions (%)               | 0.19                      |
| Disallowed regions (%)            | 0.00                      |

\*The highest resolution shell is shown in parentheses.

181 **Supplementary Table S2.** ITC thermograms summarizing the measured thermodynamic  
 182 parameters

| [Syringe] : [Cell]                             | $K_i$ (mM) | N                 | $\Delta H$<br>(kJ mol <sup>-1</sup> ) | -TDS<br>(kJ mol <sup>-1</sup> ) |
|------------------------------------------------|------------|-------------------|---------------------------------------|---------------------------------|
| [Halo] : [Vac8]                                | NB         | -                 | -                                     | -                               |
| [Halo-tVac17] : [Vac8]                         | 2.53       | $0.963 \pm 0.023$ | $-14.5 \pm 0.610$                     | -17.5                           |
| [Halo-tVac17] : [Vac8 <sup>1-10</sup> ]        | NB         | -                 | -                                     | -                               |
| [Halo-tVac17] : [Vac8 <sup>11-20</sup> ]       | NB         | -                 | -                                     | -                               |
| [Halo-tVac17 <sup>11-16-17-18</sup> ] : [Vac8] | NB         | -                 | -                                     | -                               |
| [Halo-tVac17] : [Vac8-Atg13 <sup>1-45</sup> ]  | NB         | -                 | -                                     | -                               |
| [Atg13 <sup>1-45</sup> ] : [Vac8-tVac17]       | 9.02       | $0.239 \pm 0.053$ | $-22.2 \pm 6.89$                      | -6.63                           |
| [Halo-tVac17] : [Vac8-Nvj1 <sup>29-101</sup> ] | NB         | -                 | -                                     | -                               |
| [Nvj1 <sup>29-101</sup> ] : [Vac8-tVac17]      | 10.00      | $0.05 \pm 0.133$  | $-335 \pm 944$                        | 306                             |

183

184



185 **Supplementary Table S3.** Yeast strains used in this study

| <b>Strain</b>                          | <b>Genotype</b>                                                                                                                   | <b>Reference</b> |
|----------------------------------------|-----------------------------------------------------------------------------------------------------------------------------------|------------------|
| BY4742                                 | <i>MAT<math>\alpha</math> his3<math>\Delta</math>1 leu2<math>\Delta</math>0 lys2<math>\Delta</math>0 ura3<math>\Delta</math>0</i> | (2)              |
| BY4742 <i>vac8<math>\Delta</math></i>  | BY4742 <i>vac8<math>\Delta</math>::KanMX4</i>                                                                                     | This study       |
| BY4742 <i>vac17<math>\Delta</math></i> | BY4742 <i>vac17<math>\Delta</math>::KanMX4</i>                                                                                    | This study       |
| BY4742 <i>VAC8 (L31R)</i>              | BY4742 <i>vac8<math>\Delta</math> with pRS406-VAC8 (L31R)</i>                                                                     | This study       |
| BY4742 <i>VAC8 (N234R)</i>             | BY4742 <i>vac8<math>\Delta</math> with pRS406-VAC8 (N234R)</i>                                                                    | This study       |
| BY4742 <i>VAC17-myc</i>                | BY4742 <i>vac17<math>\Delta</math> with pYJ403-VAC17-myc</i>                                                                      | This study       |
| BY4742 <i>VAC7(L336R,F339R)</i>        | BY4742 <i>vac17<math>\Delta</math> with pYJ403-VAC17 (L336R,F339R)-myc</i>                                                        | This study       |
| BY4742 <i>Ape1-EGFP</i>                | BY4742 with <i>pYJ408-Ape1-EGFP</i>                                                                                               | This study       |
| BY4742 <i>Vac8-EGFP/Vac8-myc</i>       | BY4742 <i>vac8<math>\Delta</math> with pYJ406-Vac8-EGFP and pYJ408-Vac8-myc</i>                                                   | (3)              |
| BY4742 <i>Vac8/Vac8/Vac17</i>          | BY4742 <i>Vac8-EGFP/Vac8-myc with pYJ403-Vac17-myc</i>                                                                            | This study       |
| BY4742 <i>Nvj1-mCherry</i>             | BY4742 with <i>pYJ406-Nvj1-mCherry</i>                                                                                            | This study       |
| BY4742 <i>Nvj1/Vac17</i>               | BY4742 <i>Nvj1-mCherry with pYJ403-Vac17-myc</i>                                                                                  | This study       |

186

187

188

189 **References**

190 1. M. Cabrera, C. Ungermann, Purification and in vitro analysis of yeast vacuoles.  
191 *Methods Enzymol* **451**, 177-196 (2008).

192 2. E. A. Winzeler *et al.*, Functional characterization of the *S. cerevisiae* genome by  
193 gene deletion and parallel analysis. *Science* **285**, 901-906 (1999).

194 3. H. Jeong *et al.*, Mechanistic insight into the nucleus-vacuole junction based on  
195 the Vac8p-Nvj1p crystal structure. *Proc Natl Acad Sci U S A* **114**, E4539-E4548  
196 (2017).

197
